# Supplementary material for: Simvastatin treatment varies the radiation response of human breast cells in 2D or 3D culture
Source: PubMed Central journal article supplement (PMC8068713; doi:10.1007/s10637-020-01046-6), 2020-12-11

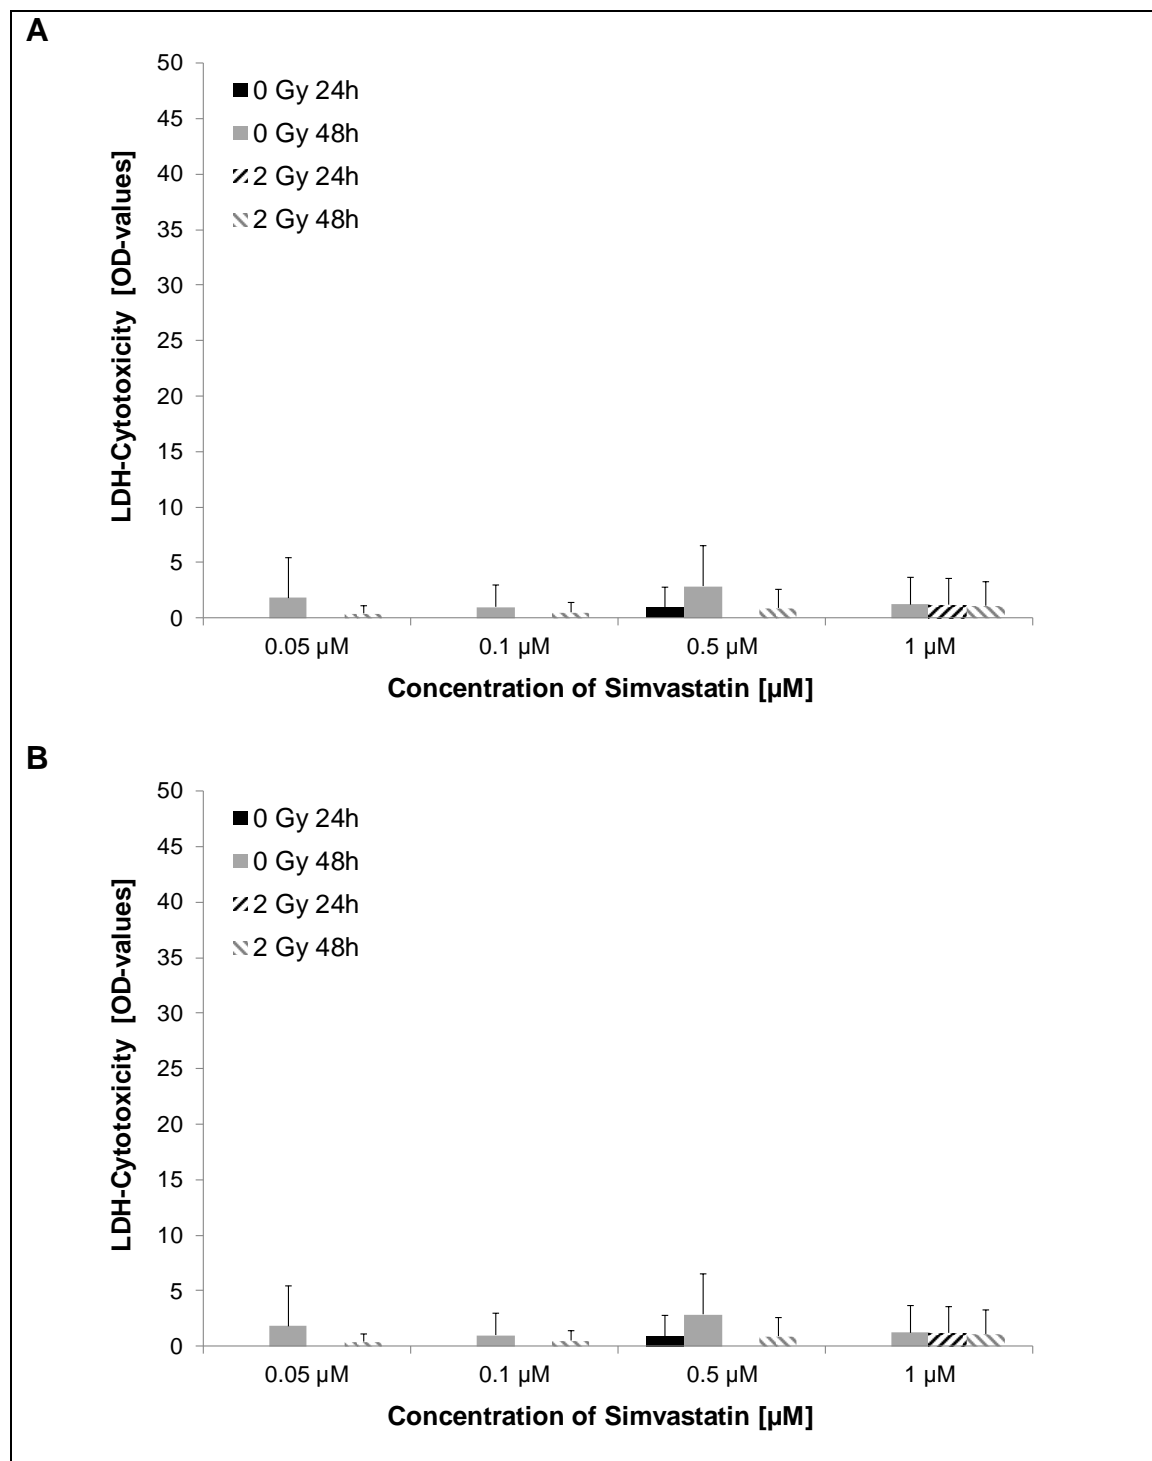

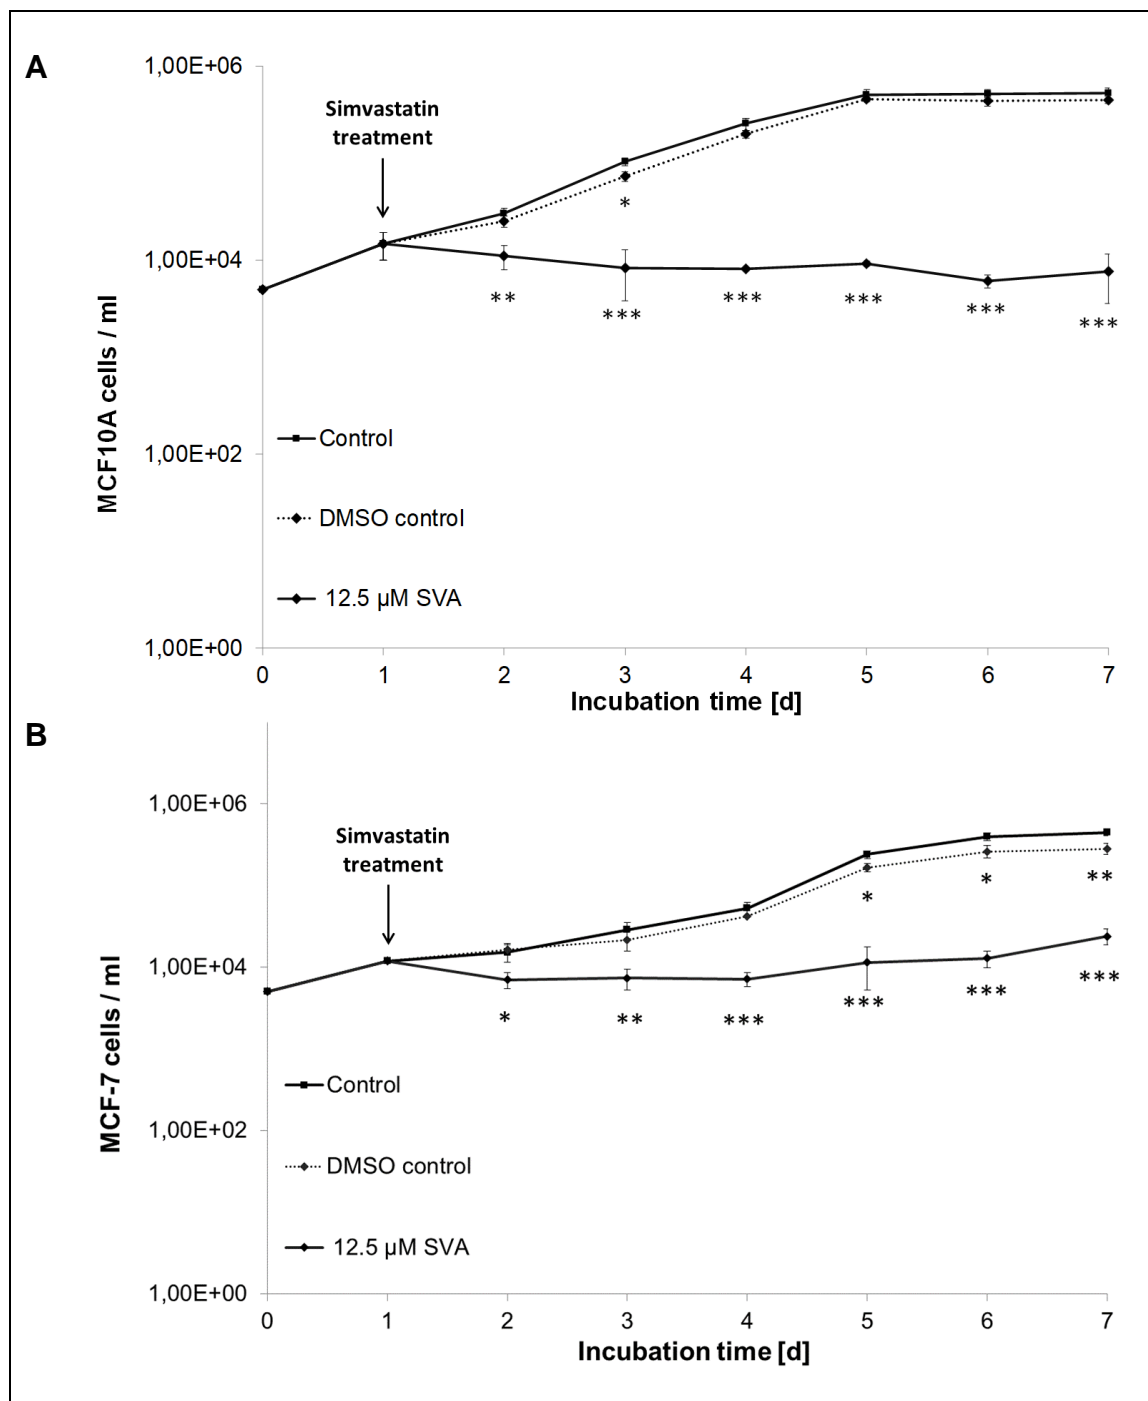

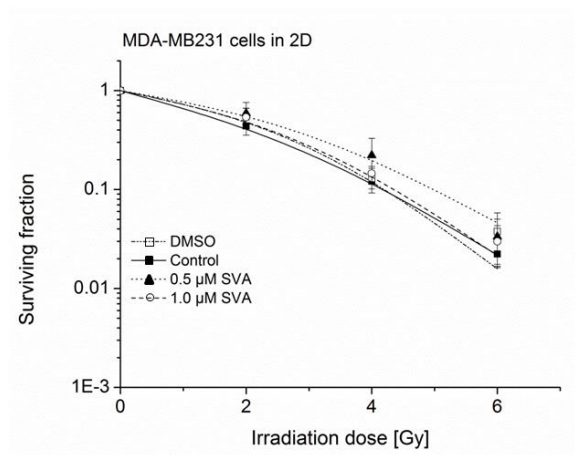

Supplement: 10637_2020_1046_MOESM1_ESM.pdf [file 10637_2020_1046_MOESM1_ESM.pdf]
